# Supplementary material for: Immune Modulation to Enhance Bone Healing—A New Concept to Induce Bone Using Prostacyclin to Locally Modulate Immunity
Source: PubMed Central journal article supplement (PMC6459956; doi:10.3389/fimmu.2019.00713), 2019-04-05
Supplement: Image_1.pdf [file Image_1.pdf]

Figure S1: Metabolic activity of activated and Iloprost treated CD8+ T cells, respectively

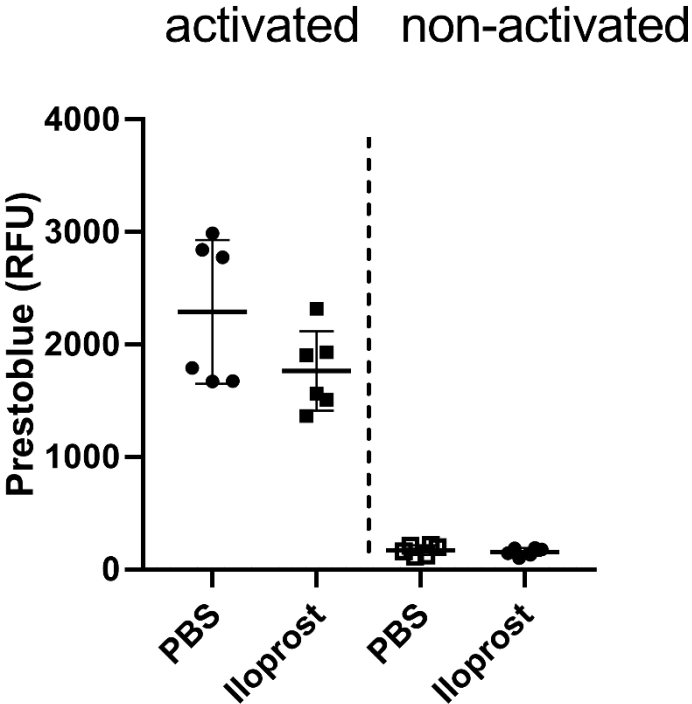

Figure S1: Metabolic activity of activated and Iloprost treated CD8+ T cells. Shown is the metabolic activity measured by Prestoblu. n = 6
